# Supplementary material
Source: PubMed Central journal article supplement (PMC8457641)

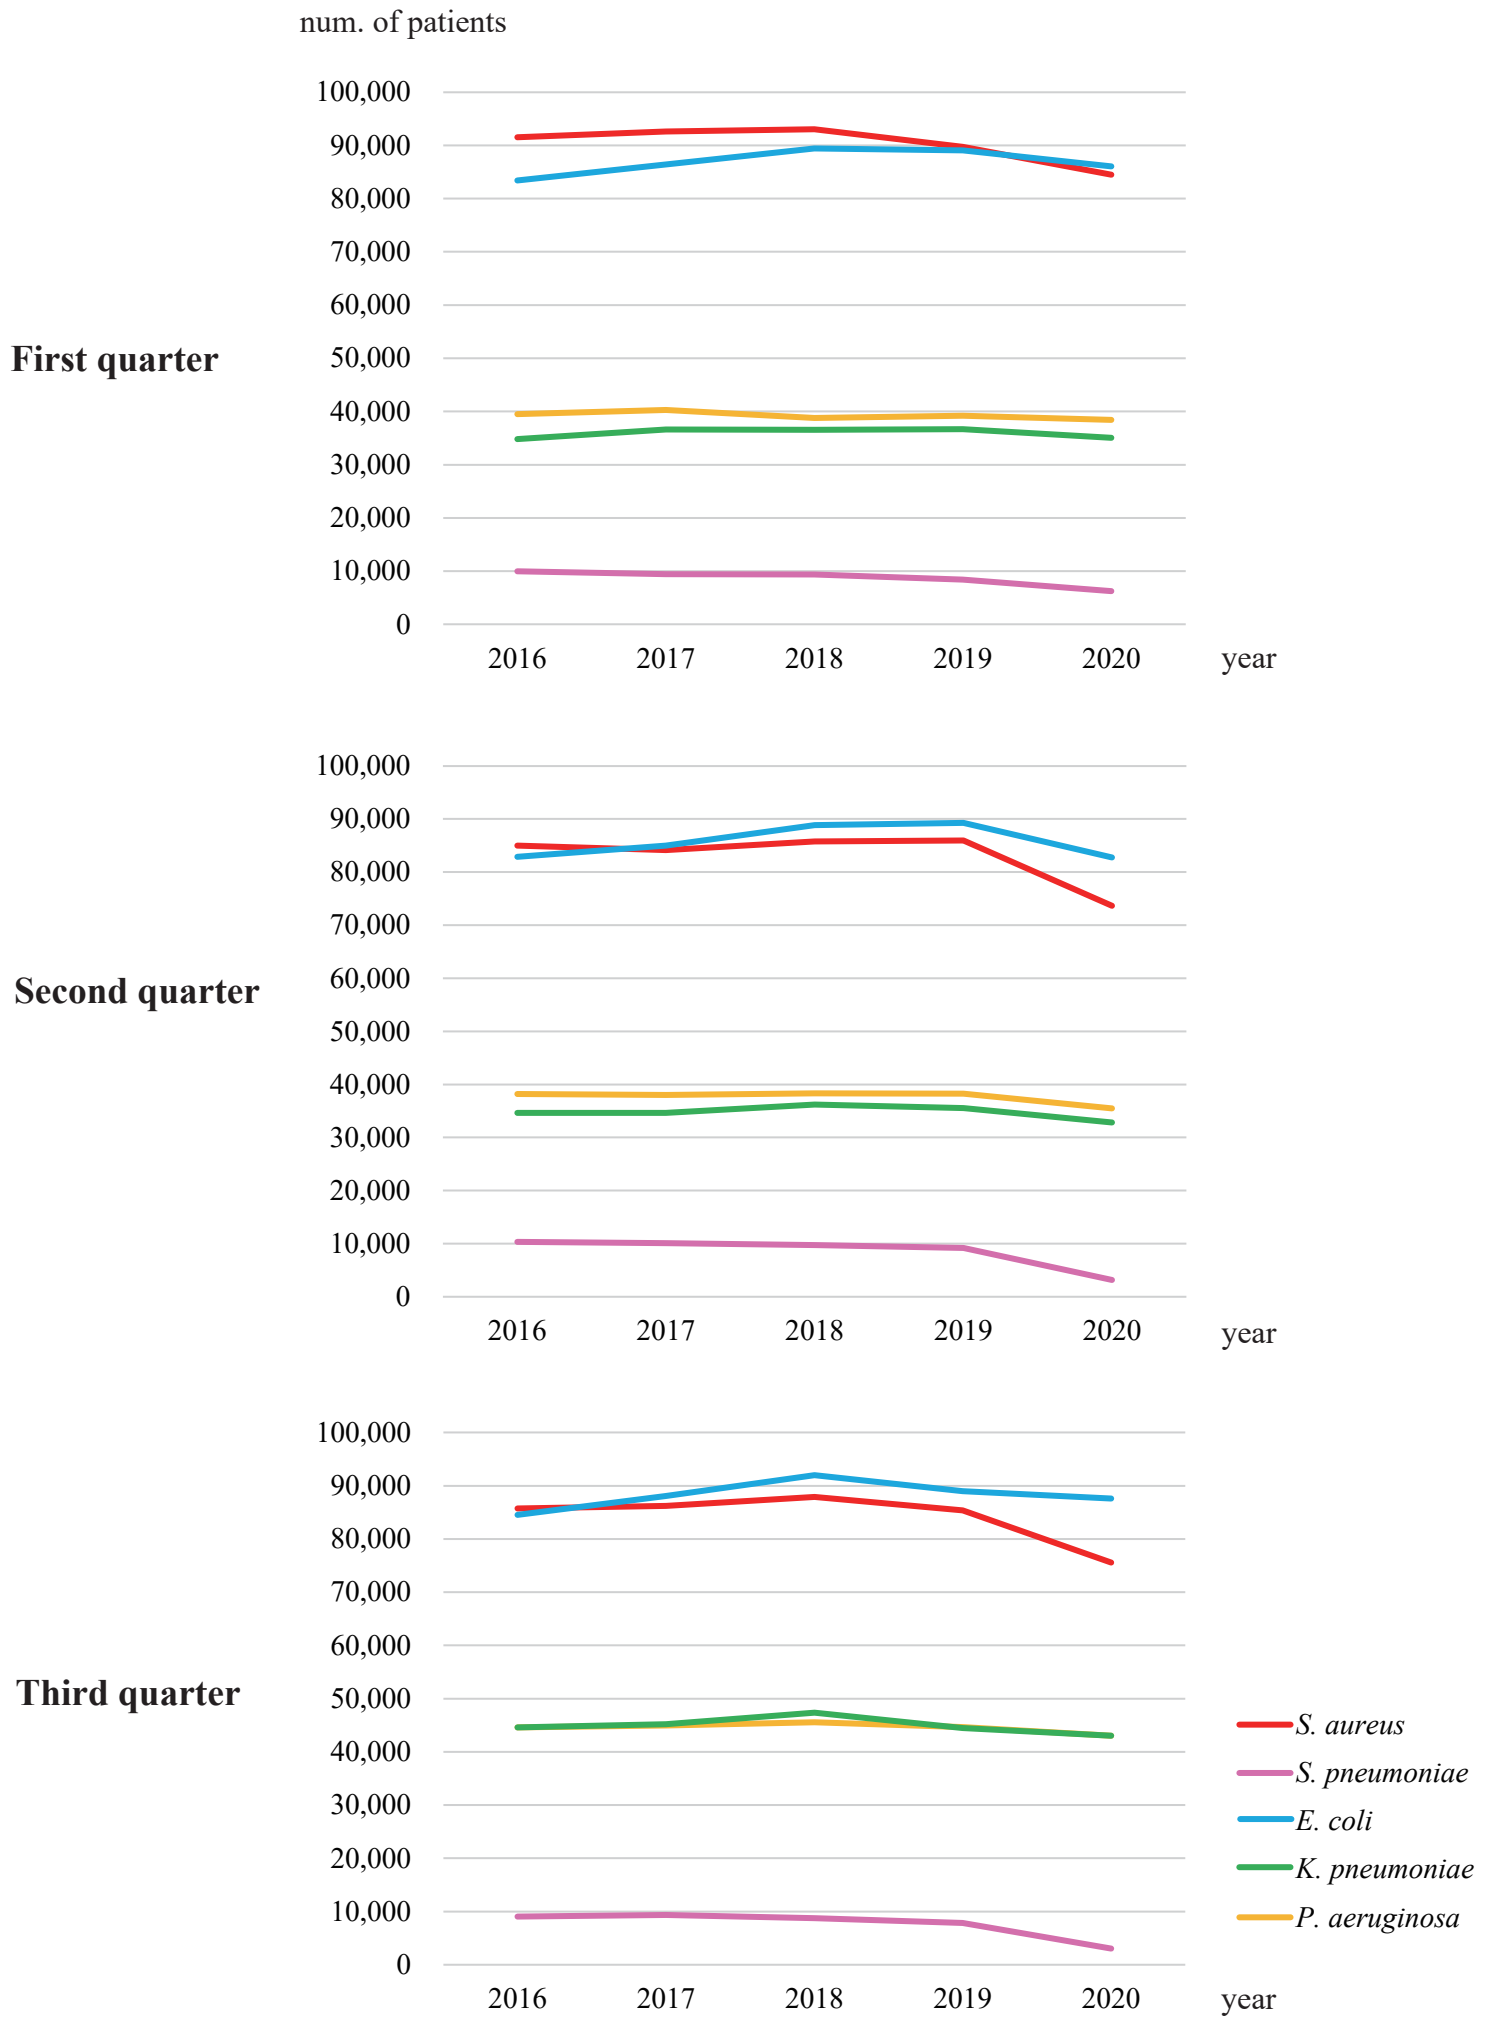

Figure S1.

Supplement: mmc1.pdf [file mmc1.pdf]

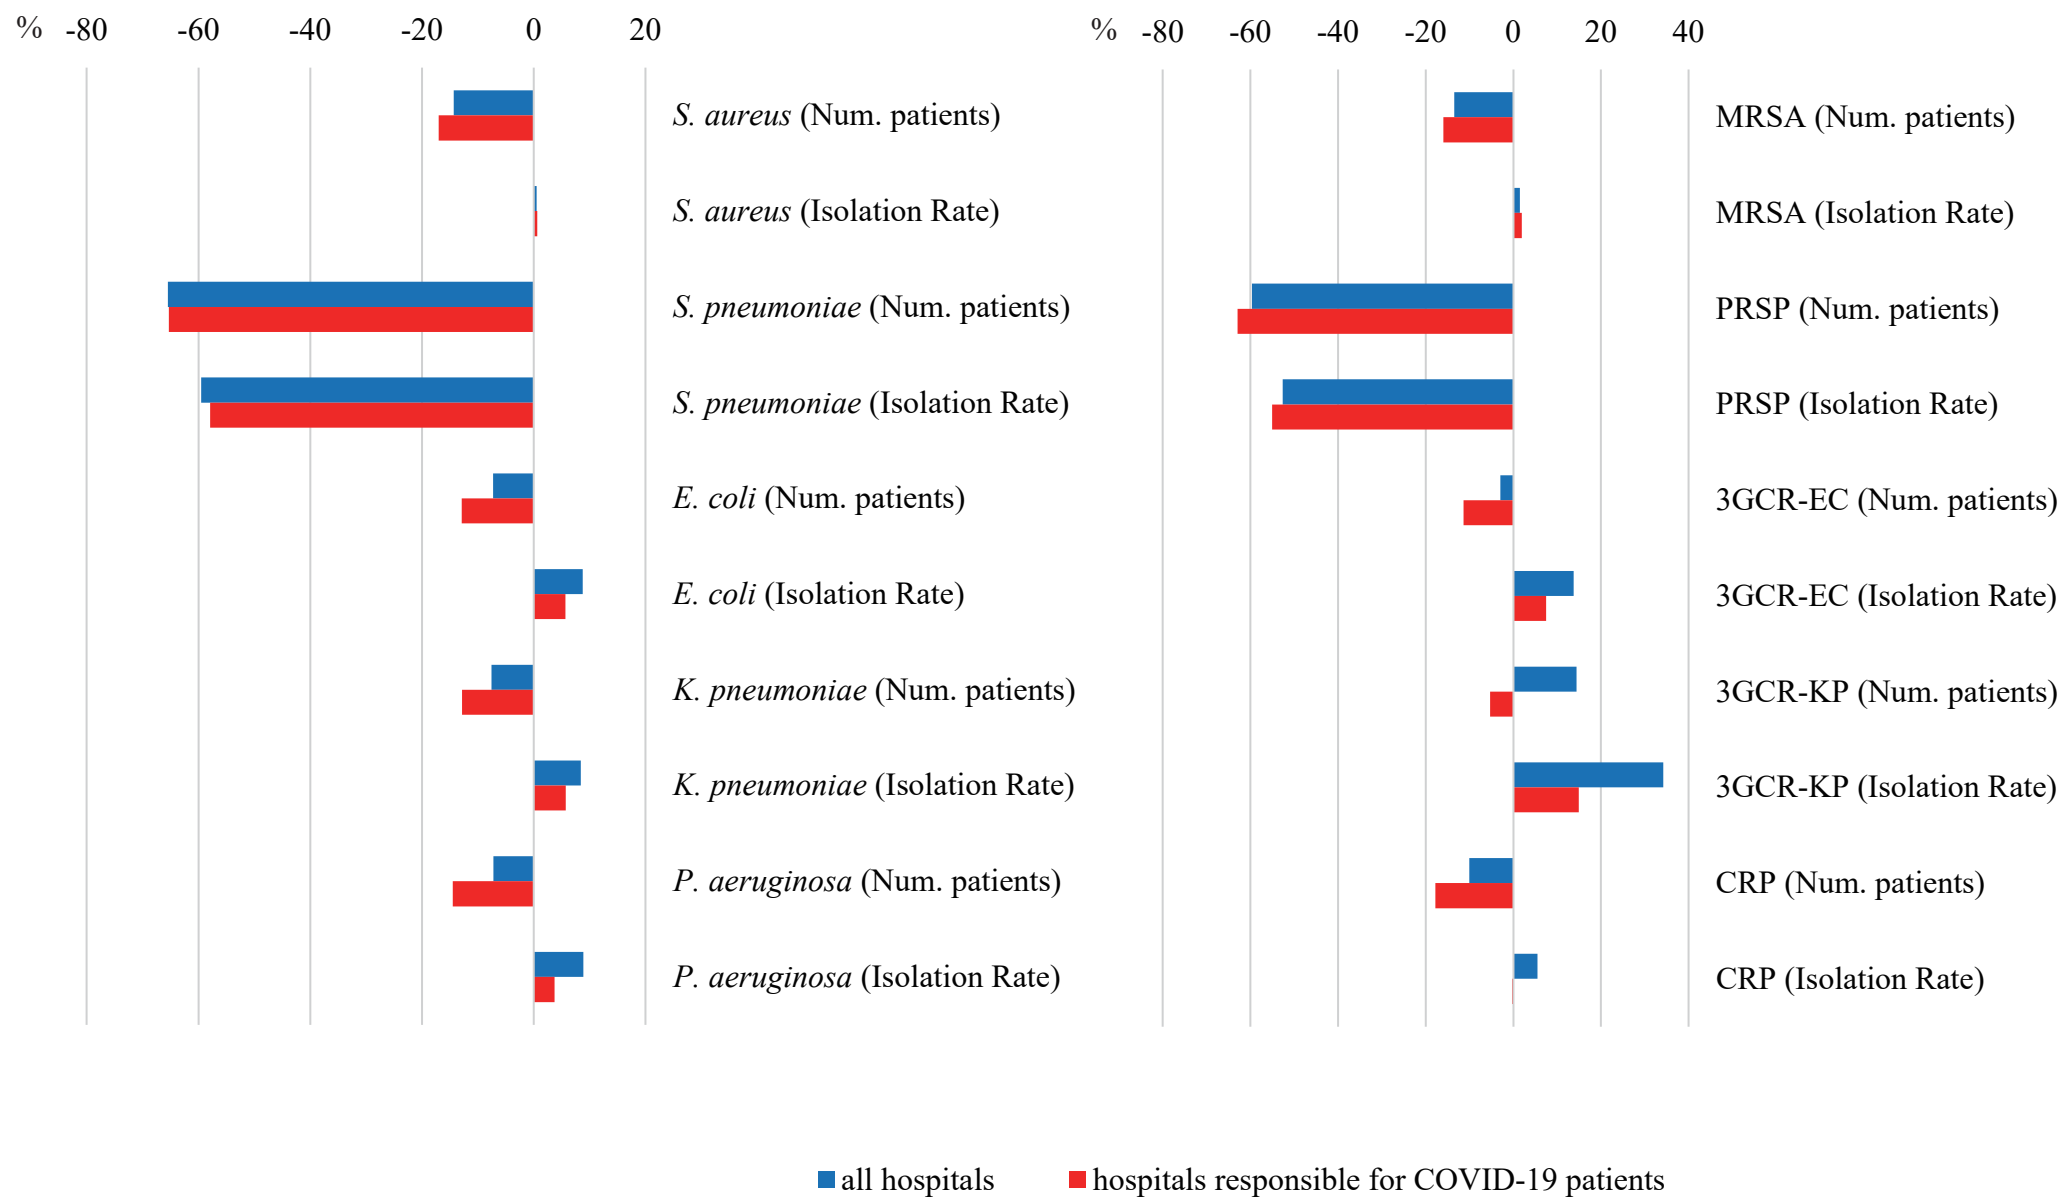

Figure S2.

Supplement: mmc2.pdf [file mmc2.pdf]
